# Supplementary material for: The Effectiveness of Rehabilitation after Open Surgical Release for Trigger Finger: A Prospective, Randomized, Controlled Study
Source: MDPI journal article supplement (doi:10.3390/jcm12227187), 2023-11-20
Supplement: s1 [file s1]

## Supplementary Material

**Table S1.** Clinical outcomes at 6 months after surgery. The data show the mean and 95% confidential interval.

| Item               | Number              |                            | <i>p</i> -Value |
|--------------------|---------------------|----------------------------|-----------------|
|                    | Control<br>(n = 29) | Rehabilitation<br>(n = 28) |                 |
| Grip strength (kg) | 22.2 (18.7–25.8)    | 22.0 (19.3–24.6)           | 1.00            |
| DASH               | 12.8 (6.4–19.2)     | 6.9 (2.6–11.3)             | 0.13            |
| Pain-VAS           | 1.4 (0.6–2.3)       | 1.5 (0.6–2.4)              | 0.93            |
